# Supplementary material for: A database for risk assessment and comparative genomic analysis of foodborne Vibrio parahaemolyticus in China
Source: PubMed Central journal article supplement (PMC7532206; doi:10.1038/s41597-020-00671-3), 2020-10-02

Colored ranges

- cluster1
- cluster2
- cluster3
- cluster4
- cluster5
- cluster6
- cluster7
- cluster8
- cluster9
- cluster10
- cluster11

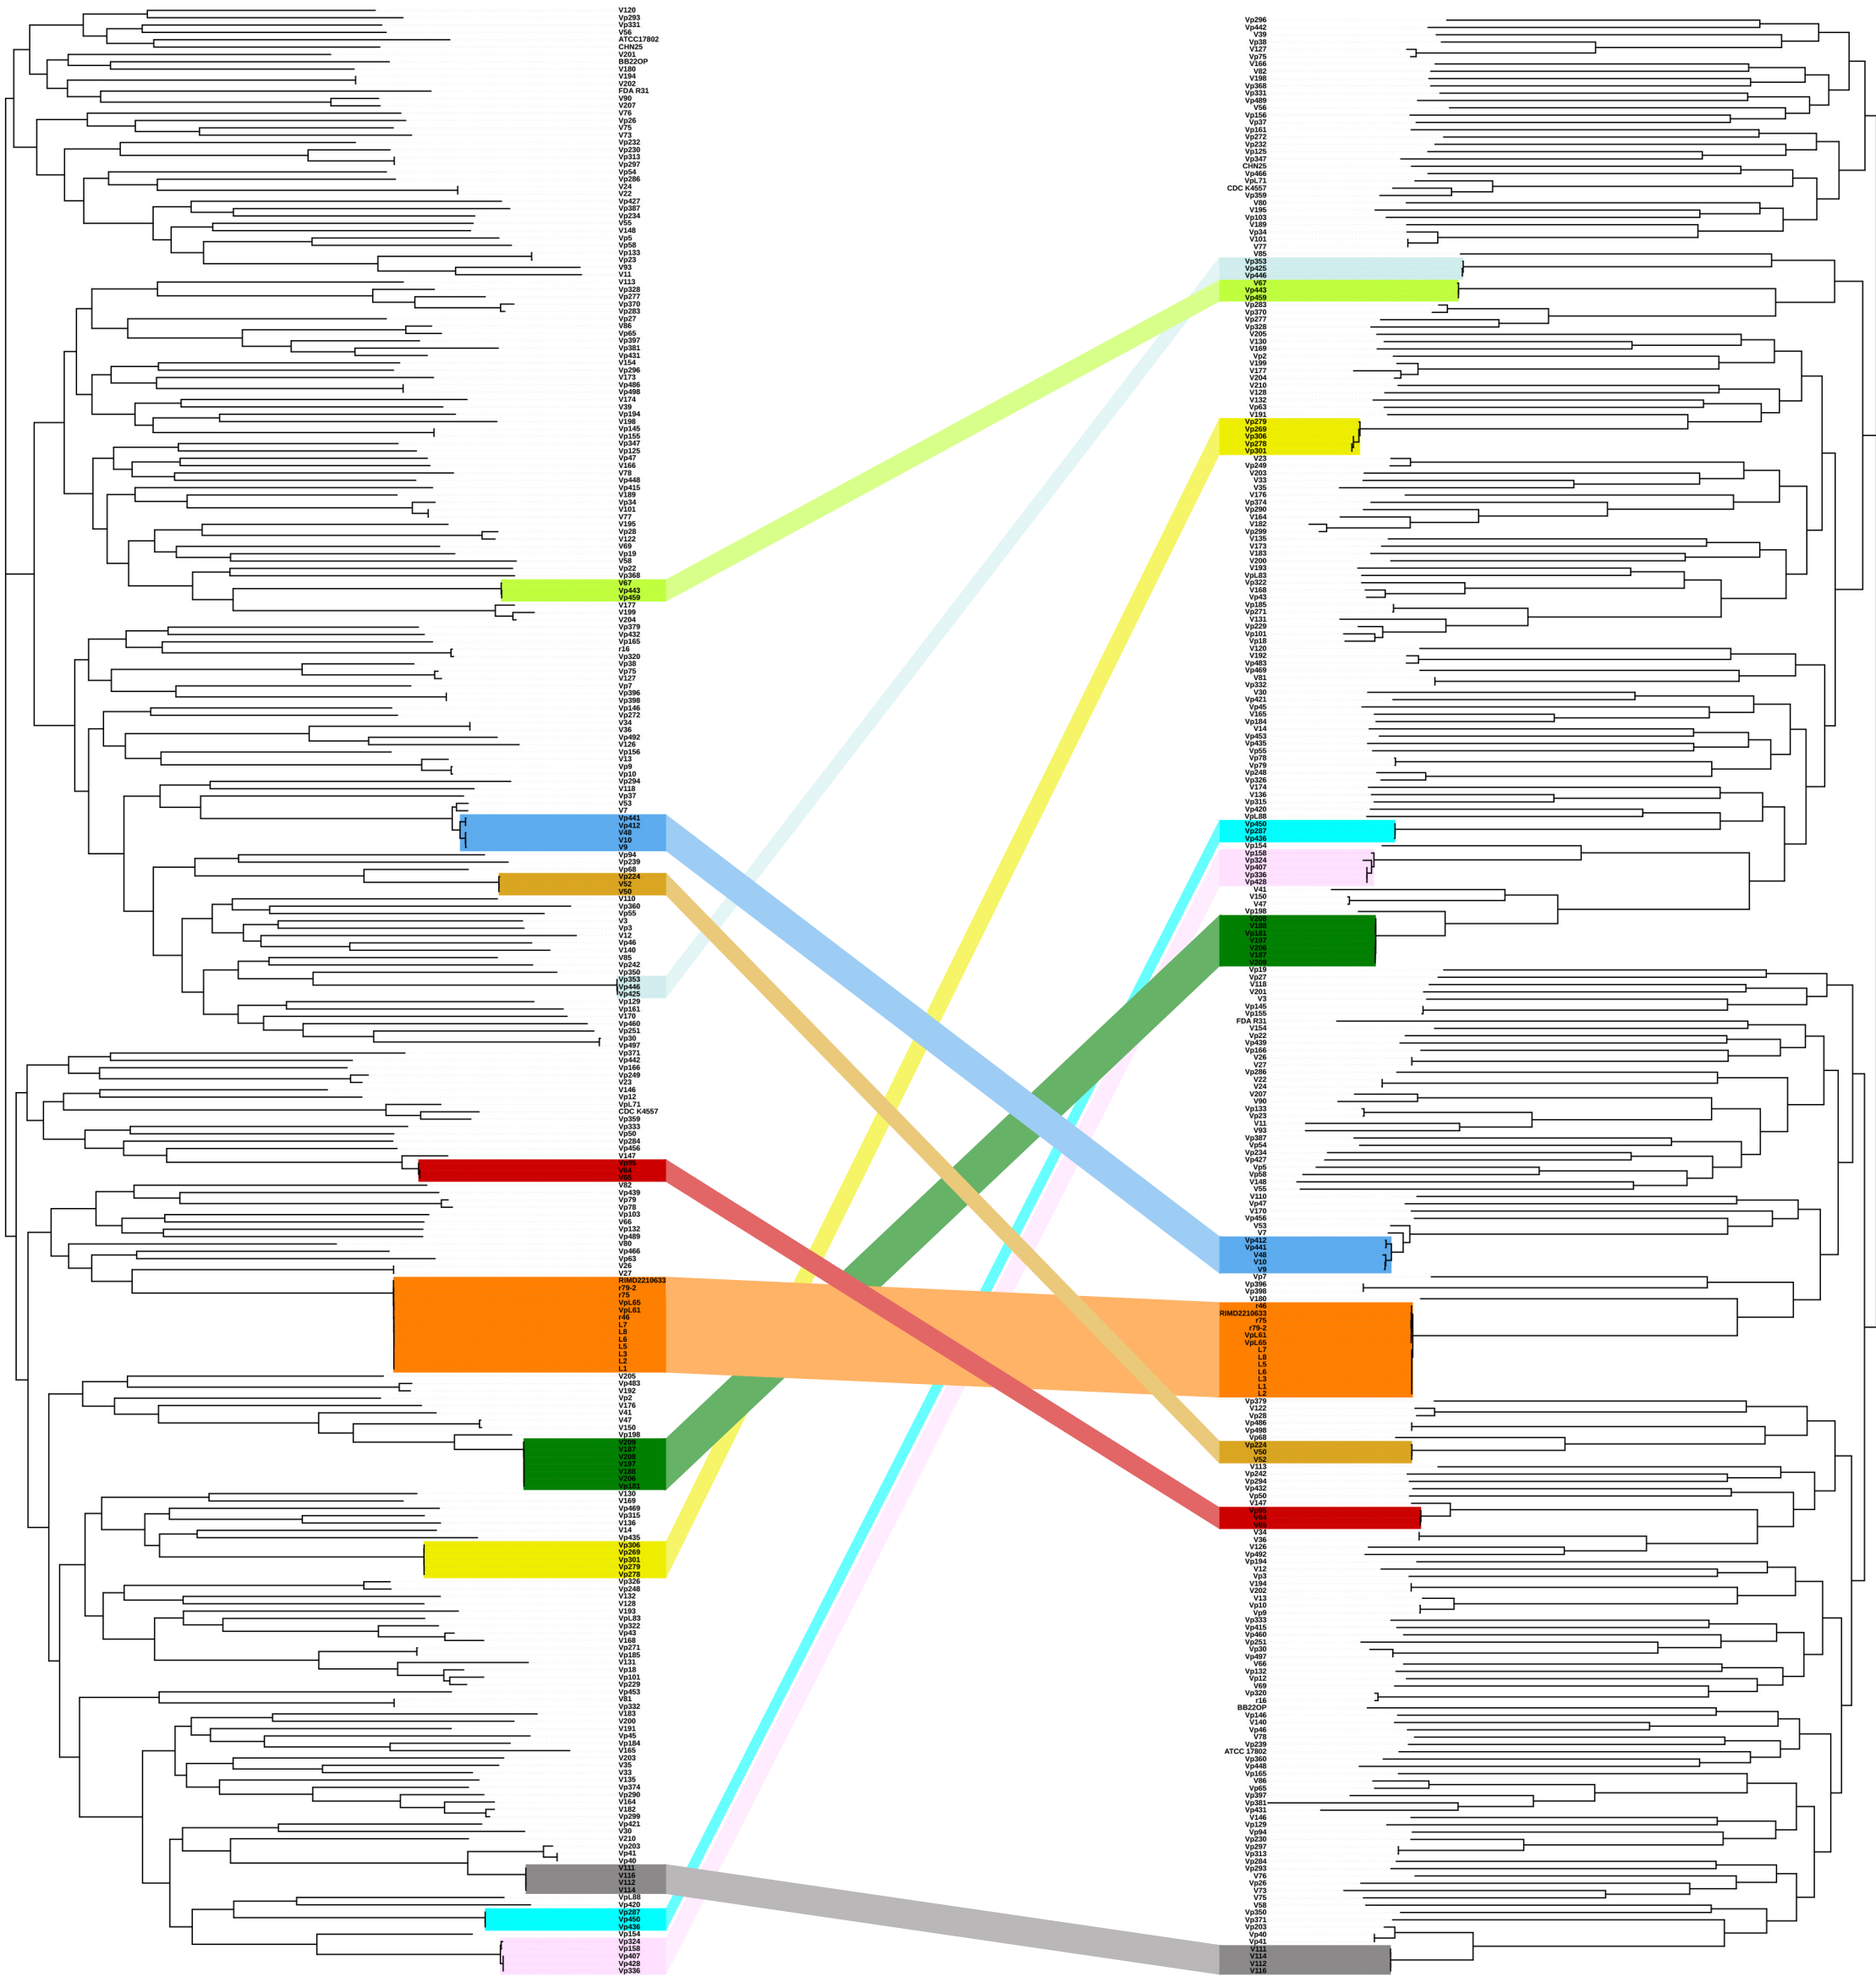

Supplement: 41597_2020_671_MOESM2_ESM.pdf [file 41597_2020_671_MOESM2_ESM.pdf]
